# Supplementary material
Source: publisher site journal article supplement (https://www.dovepress.com/article/215983)
Supplement: Supplementary file 1 [file get_supplementary_file.php]

Supplementary materials

Supplementary Figure 1 Flow diagram showing selection of the analytic samplez

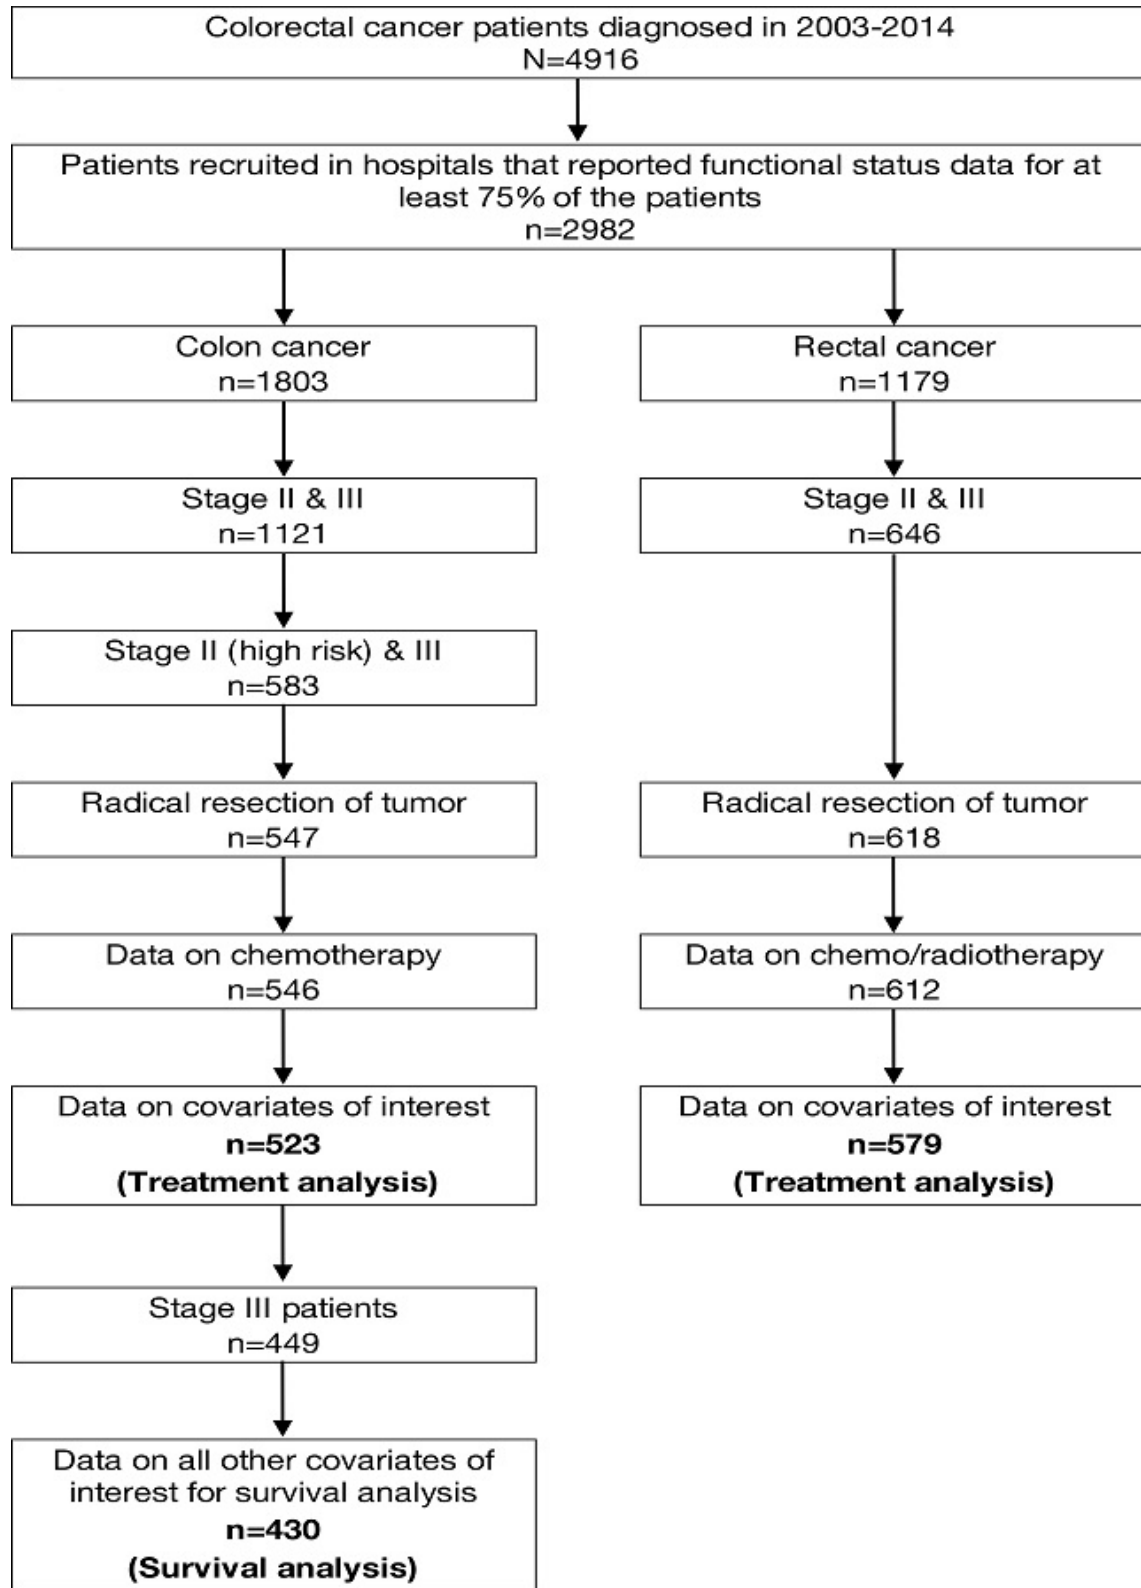

**Supplementary Table 1** Definition and frequency of comorbidities in the Charlson comorbidity index

| Comorbidities                                       | ICD-10 codes used                                                                                                          | n       | %    | Charlson's weight |
|-----------------------------------------------------|----------------------------------------------------------------------------------------------------------------------------|---------|------|-------------------|
| Myocardial infarction                               | I21.1, I21.3, I21.4, I21.9, I22, I23, I25.1, I25.2, I25.6                                                                  | 86      | 7.8  | 1                 |
| Congestive heart failure                            | I11.0, I13.0, I13.2, I50, I50.0, I50.1, I50.3, I50.4, I50.9                                                                | 47      | 4.3  | 1                 |
| Peripheral vascular disease                         | I70, I71, I72, I73, I77, K55                                                                                               | 82      | 7.4  | 1                 |
| Stroke & hemi/paraplegia                            |                                                                                                                            | 62      | 5.6  |                   |
| Stroke <sup>1</sup>                                 | G45, G46, I60 – I69, Z86.7                                                                                                 | 60      |      | 1                 |
| Hemi/paraplegia <sup>1</sup>                        | G11.4, G80, G81, G82, G83, I69.05                                                                                          | 2       |      | 2                 |
| COPD                                                | J40 – J47, J60 – J70, J84.1, J92, J96.1, 98.2, J98.3, I27.8, I27.9                                                         | 80      | 7.3  | 1                 |
| Chronic renal disease                               | N01 – N05, N07, N11, N17 – N19, N25, I12.0, I13.1, I13.2, Z49, Z94.0, Z99.2                                                | 80      | 7.3  | 2                 |
| Chronic liver disease                               |                                                                                                                            | 62      | 5.6  |                   |
| Mild <sup>1</sup>                                   | K70 – K76, B18                                                                                                             | 62      |      | 1                 |
| Moderate-severe <sup>1</sup>                        | K70.4, K71.1, K72.1, K72.9, K76.7, B15, B16, B19, Z94.4                                                                    | 0       |      | 3                 |
| Diabetes mellitus                                   |                                                                                                                            | 214     | 18.6 |                   |
| Without complications <sup>1</sup>                  | E10.x – E14.x (where x = 0, 1 or 9)                                                                                        | 196     |      | 1                 |
| With complications <sup>1</sup>                     | E10.x – E14.x (where x = 2, 3, 4, 5, 6, 7 or 8)                                                                            | 9       |      | 2                 |
| Gastric/duodenal ulcer                              | K25 – K28                                                                                                                  | 5       | 0.5  | 1                 |
| Rheumatoid disease                                  | M05, M06, M08, M30 – M36                                                                                                   | 5       | 0.5  | 1                 |
| Dementia                                            | F00, F01, F02, F03, F05.1, G30, G30.9, G31.1                                                                               | 8       | 0.7  | 1                 |
| Non-colorectal cancer (except basal skin carcinoma) | C00–C17, C21–C26, C30–C34, C37– C41, C43, C45–C58, C60– C76, C81–C85, C88, C90–C97, Z85.x (where x =0, 2, 3, 4, 5, 6 or 8) | 104     | 9.4  | 2                 |
| Charlson comorbidity index (CCI) score*             |                                                                                                                            |         |      |                   |
| Median (range)                                      |                                                                                                                            | 0 (0-8) |      |                   |
| CCI 0                                               |                                                                                                                            | 585     | 53.1 |                   |
| CCI 1                                               |                                                                                                                            | 215     | 19.5 |                   |
| CCI 2                                               |                                                                                                                            | 156     | 14.2 |                   |
| CCI 3+                                              |                                                                                                                            | 146     | 13.2 |                   |

ICD, International Statistical Classification of Diseases; COPD, Chronic obstructive pulmonary disease

\*HIV/AIDS did not contribute to the comorbidity scoring because none of the patients had this comorbid condition

<sup>1</sup>Are mutually exclusive (when both were present, the one with higher Charlson's weight was considered)

**Supplementary Table 2** Comorbidity and treatment patterns according to tumor stage

|              | Colon cancer (II* & III) |      |                                        | Rectal cancer (stage II & III) |      |                                        |                       |      |                                        |
|--------------|--------------------------|------|----------------------------------------|--------------------------------|------|----------------------------------------|-----------------------|------|----------------------------------------|
|              | Adjuvant chemotherapy    |      |                                        | Neoadjuvant CRT                |      |                                        | Adjuvant Chemotherapy |      |                                        |
|              | n                        | %    | OR <sup>†</sup> (95% CI)               | n                              | %    | OR <sup>†</sup> (95% CI)               | n                     | %    | OR <sup>†</sup> (95% CI)               |
| <b>Stage</b> |                          |      | <i>p</i> <sub>interaction</sub> =0.531 |                                |      | <i>p</i> <sub>interaction</sub> =0.904 |                       |      | <i>p</i> <sub>interaction</sub> =0.755 |
| <b>II</b>    |                          |      |                                        |                                |      |                                        |                       |      |                                        |
| CCI 0        | 23                       | 62.2 | Ref <sup>1</sup>                       | 30                             | 28.6 | Ref                                    | 40                    | 38.1 | Ref                                    |
| CCI 1        | 2                        | 18.2 | <b>0.14 (0.03-0.72)</b>                | 11                             | 25.0 | 0.67 (0.21-2.14)                       | 13                    | 29.6 | 1.13 (0.47-2.69)                       |
| CCI ≥2       | 2                        | 7.7  | <b>0.05 (0.01-0.25)</b>                | 11                             | 15.5 | 0.62 (0.20-1.87)                       | 20                    | 28.2 | 1.19 (0.55-2.57)                       |
| <b>III</b>   |                          |      |                                        |                                |      |                                        |                       |      |                                        |
| CCI 0        | 203                      | 86.8 | Ref                                    | 103                            | 49.3 | Ref                                    | 164                   | 78.5 | Ref                                    |
| CCI 1        | 60                       | 62.5 | <b>0.45 (0.23-0.89)</b>                | 25                             | 39.1 | <b>0.42 (0.18-0.98)</b>                | 44                    | 68.8 | 0.78 (0.38-1.57)                       |
| CCI ≥2       | 66                       | 55.5 | <b>0.37 (0.20-0.71)</b>                | 31                             | 36.1 | 0.57 (0.26-1.24)                       | 57                    | 66.3 | 0.78 (0.40-1.52)                       |

CRT, Chemoradiotherapy; OR, Odds ratio; CI, Confidence interval; CCI, Charlson comorbidity index score

<sup>†</sup>Adjusted for age, sex, tumor grade, number of lymph nodes examined, years of school education, having a partner, year of diagnosis, surgical technique, surgical volume, functional status and functional status assessment time (backward elimination of covariates with *p*>0.5; age, sex and functional status were forced into the model)

<sup>1</sup>Crude estimates

Statistically significant results are highlighted in bold

**Supplementary Table 3** Association of chemotherapy use with survival outcomes in stage III patients stratified by body mass index (BMI, kg/m<sup>2</sup>) at colon cancer diagnosis

| BMI <sup>†</sup> | Outcomes | Chemo | <i>n</i> | <i>e</i> | HR* (95% CI)     | <i>p</i> <sub>interaction</sub> |
|------------------|----------|-------|----------|----------|------------------|---------------------------------|
| 18.5-24.9        | OS       | No    | 49       | 29       | Ref              |                                 |
|                  |          | Yes   | 123      | 36       | 0.80 (0.55-1.16) |                                 |
| 25+              | OS       | No    | 59       | 32       | Ref              | 0.773                           |
|                  |          | Yes   | 192      | 60       | 0.75 (0.55-1.02) |                                 |
| 18.5-24.9        | DSS      | No    | 49       | 13       | Ref              |                                 |
|                  |          | Yes   | 123      | 25       | 0.76 (0.44-1.30) |                                 |
| 25+              | DSS      | No    | 59       | 13       | Ref              | 0.712                           |
|                  |          | Yes   | 192      | 38       | 0.81 (0.54-1.21) |                                 |

BMI, Body mass index ; Chemo, received adjuvant chemotherapy; *e*, Number of events; HR, Hazard ratio; CI, Confidence interval; *n*, Number at risk; OS, Overall survival; DSS, Disease-specific survival

<sup>†</sup>Patients with underweight (<18.5kg/m<sup>2</sup>, n=7) were excluded

\*Estimates are from propensity scores analysis and included age, sex, having a partner, years of school education, smoking status, lifetime physical activity, lifetime alcohol consumption, N-stage, T-stage, surgical technique and surgical volume, Charlson comorbidity scores, functional status and functional status assessment time

**Supplementary Table 4** Comparison of estimates for chemotherapy benefits from various propensity score methods in stage III colon cancer patients

| Outcomes           | Chemo | PS weighting                    |                                               | PS adjustment           |
|--------------------|-------|---------------------------------|-----------------------------------------------|-------------------------|
|                    |       | Original weight<br>HR* (95% CI) | Truncated weight <sup>1</sup><br>HR* (95% CI) | HR* (95% CI)            |
| OS                 | No    | Ref                             |                                               | Ref                     |
|                    | Yes   | <b>0.73 (0.58-0.92)</b>         | <b>0.65 (0.52-0.83)</b>                       | <b>0.64 (0.43-0.97)</b> |
| DSS                | No    | Ref                             |                                               | Ref                     |
|                    | Yes   | 0.77 (0.56-1.06)                | <b>0.71 (0.51-0.97)</b>                       | 0.72 (0.40-1.29)        |
| nDSS               | No    | Ref                             |                                               | Ref                     |
|                    | Yes   | <b>0.66 (0.46-0.92)</b>         | <b>0.59 (0.42-0.83)</b>                       | <b>0.51 (0.28-0.91)</b> |
| nDSS for <75 years | No    | Ref                             | Ref                                           | Ref                     |
|                    | Yes   | <b>0.33 (0.17-0.63)</b>         | <b>0.29 (0.15-0.54)</b>                       | <b>0.31 (0.10-0.93)</b> |
| nDSS for 75+ years | No    | Ref                             | Ref                                           | Ref                     |
|                    | Yes   | 1.05 (0.69-1.59)                | 1.05 (0.69-1.59)                              | 0.69 (0.36-1.32)        |

Chemo, received adjuvant chemotherapy; HR, Hazard ratio; CI, Confidence interval; OS, Overall survival; DSS, Disease-specific survival; nDSS, Non-disease-specific survival

<sup>1</sup>Weight truncated at the 99<sup>th</sup> percentile of the chemotherapy non-recipients

\*Propensity scores were calculated from age, sex, having a partner, years of school education, body mass index, smoking status, lifetime physical activity, lifetime alcohol consumption, N-stage, T-stage, surgical technique and surgical volume, Charlson comorbidity scores, functional status and functional status assessment time (statistically significant results are highlighted in bold)

**Supplementary Table 5** Association of chemotherapy use with survival outcomes, accounted for immortal time bias and competing events

| Outcome | Chemotherapy | Propensity score weighting | Accounted for immortal time bias | Accounted for competing events |
|---------|--------------|----------------------------|----------------------------------|--------------------------------|
|         |              | HR <sup>1</sup> (95% CI)   | HR <sup>2</sup> (95% CI)         | sHR <sup>3</sup> (95% CI)      |
| OS      | No           | Ref                        | Ref                              |                                |
|         | Yes          | <b>0.73 (0.58-0.92)</b>    | <b>0.75 (0.60-0.95)</b>          | --                             |
| DSS     | No           | Ref                        | Ref                              | Ref                            |
|         | Yes          | 0.77 (0.56-1.06)           | 0.78 (0.57-1.07)                 | 0.83 (0.61-1.13)               |
| nDSS    | No           | Ref                        | Ref                              | Ref                            |
|         | Yes          | <b>0.66 (0.46-0.92)</b>    | <b>0.70 (0.50-1.00)</b>          | 0.73 (0.53-1.01)               |

HR, Hazard ratio; CI, Confidence interval; sHR, Subdistribution hazard ratio; OS, Overall survival; DSS, Disease-specific survival; nDSS, Non-disease-specific survival

<sup>1</sup>Propensity score was calculated from age, sex, having a partner, years of school education, body mass index, smoking status, lifetime physical activity, lifetime alcohol consumption, N-stage, T-stage, tumor grade, number of examined lymph nodes, surgical volume, surgical technique, Charlson comorbidity scores, functional status and functional status assessment time

<sup>2</sup>Model 1 accounted for immortal time bias

<sup>3</sup>Model 1 accounted for competing events, using the Fine and Gray model

Statistically significant results are highlighted in bold

**Supplementary Table 6** Frequency of mortality incidents from causes other than colon cancer

| Cause of death                      | N         | %    | Chemotherapy |      | No chemotherapy |      |
|-------------------------------------|-----------|------|--------------|------|-----------------|------|
|                                     |           |      | n            | %    | n               | %    |
| Cardiovascular incidents            | 27        | 39.1 | 9            | 27.3 | 18              | 50.0 |
| <i>Cardiac problems</i>             | 14        |      |              |      |                 |      |
| <i>Vascular</i>                     | 8         |      |              |      |                 |      |
| <i>Cerebrovascular (stroke)</i>     | 3         |      |              |      |                 |      |
| <i>Hematologic problems</i>         | 2         |      |              |      |                 |      |
| Other cancers                       | 20        | 29.0 | 15           | 45.5 | 5               | 13.9 |
| <i>Pulmonary</i>                    | 4         |      |              |      |                 |      |
| <i>Gastrointestinal</i>             | 6         |      |              |      |                 |      |
| <i>Urinary</i>                      | 3         |      |              |      |                 |      |
| <i>Reproductive</i>                 | 2         |      |              |      |                 |      |
| <i>Hematologic</i>                  | 2         |      |              |      |                 |      |
| <i>Other sites or unspecified</i>   | 3         |      |              |      |                 |      |
| Pulmonary problems                  | 9         | 13.0 | 2            | 6.0  | 7               | 19.4 |
| <i>COPD</i>                         | 4         |      |              |      |                 |      |
| <i>Embolus/bronchitis/pneumonia</i> | 5         |      |              |      |                 |      |
| Gastrointestinal problems           | 3         | 4.3  | 2            | 6.0  | 1               | 2.8  |
| Parkinson disease                   | 1         | 1.5  | 0            | 0.0  | 1               | 2.8  |
| Renal failure                       | 2         | 2.9  | 2            | 6.0  | 0               | 0.0  |
| Sepsis                              | 1         | 1.5  | 0            | 0.0  | 1               | 2.8  |
| Others                              | 6         | 8.7  | 3            | 9.1  | 3               | 8.3  |
| <b>Total</b>                        | <b>69</b> |      | <b>33</b>    |      | <b>36</b>       |      |

COPD, Chronic obstructive pulmonary disease
